# Supplementary material
Source: MDPI journal article supplement (https://www.mdpi.com/2673-4591/9/1/7)
Supplement: s1 [file s1]

# MOLECULAR AND PHENOTYPIC DIVERSITY OF INDIGENOUS OENOLOGICAL STRAINS OF *SACCHAROMYCES CEREVISIAE* ISOLATED IN GREECE <sup>†</sup>

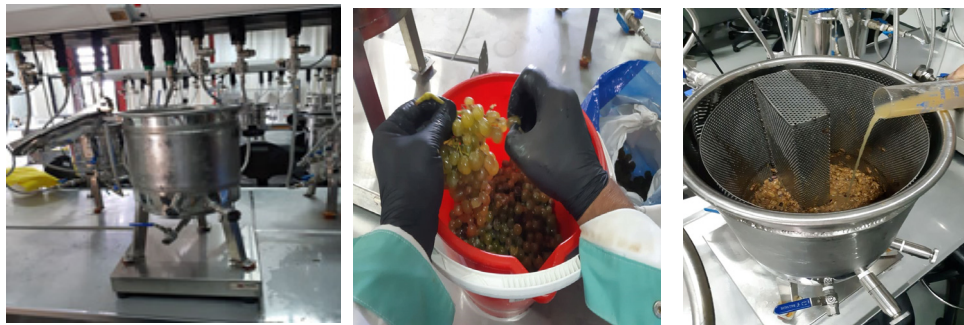

**Figure S1.** a) Stain steel fermentation tanks b) grapes destemming c) initiation of spontaneous alcoholic fermentation

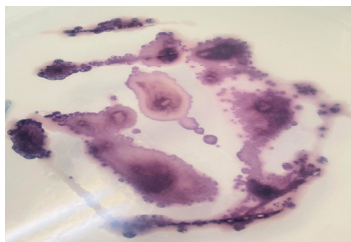

**Figure S2.** *Saccharomyces cerevisiae* in Chromagar medium.

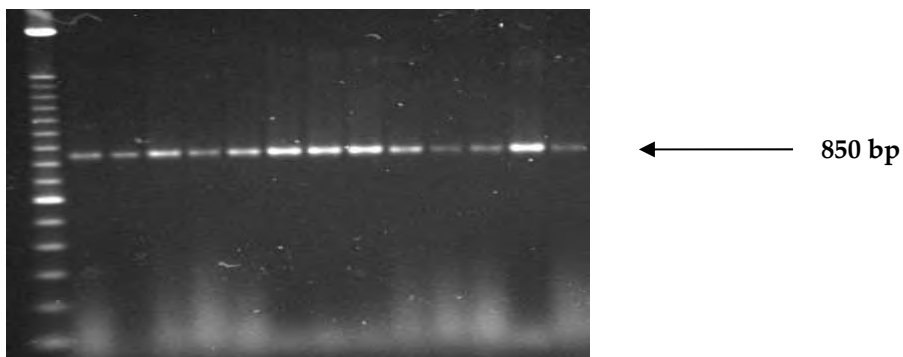

**Figure S3** Agarose gel analysis of PCR products

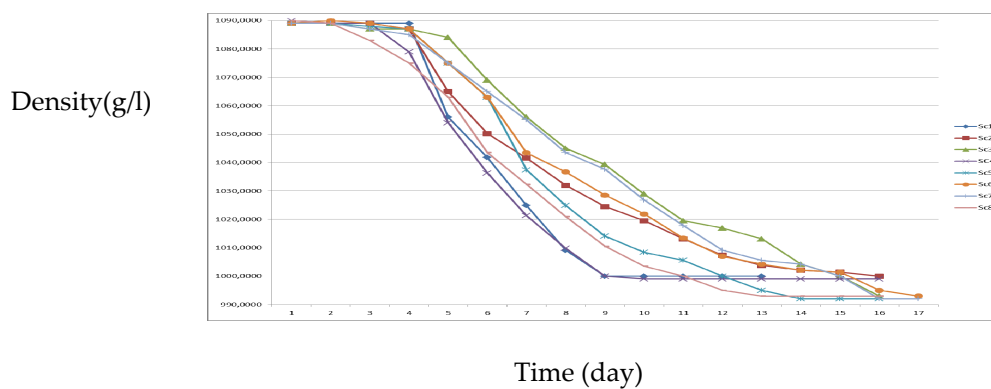

**Figure S4** Kinetics of pilot-scale fermentations of inoculated grape must with indigenous *S. cerevisiae*

**Table S1** Different fermentative responses of indigenous wine *Saccharomyces cerevisiae*

| Fermentative type | Isolate identity* | Glu | Suc | Mal | Raf |
|-------------------|-------------------|-----|-----|-----|-----|
| I                 | MBm4              | +   | +   | +   | –   |
| II                | MCe2              | +   | +   | +   | +   |
| III               | MCi10             | -   | +   | A   | +   |
| IV                | Others            | +   | +   | +   | A   |

Glu, Glucose; Suc, sucrose; Mal, maltose; Raf, raffinose; +, fermentation positive; A, assimilation positive; –, fermentation and assimilation negative. \*Capital letters indicate grape and type of viticulture and small letters indicate fermentation stage: MCi, Malagousia must, Conventional culture, initial stage. Arabic numbers represent the isolate number.
